# Supplementary material
Source: PubMed Central journal article supplement (PMC7004222)
Supplement: supp_8.1.E16_2019-0018-1-at.pdf [file supp_8.1.E16_2019-0018-1-at.pdf]

**Appendix 1 (as supplied by the authors): Incidence of CDI based on location of acquisition and onset (2005 to 2014)**

| Characteristic                            | 2005                     | 2006                     | 2007                     | 2008                     | 2009                     | 2010                     | 2011                     | 2012                     | 2013                     | 2014                     |
|-------------------------------------------|--------------------------|--------------------------|--------------------------|--------------------------|--------------------------|--------------------------|--------------------------|--------------------------|--------------------------|--------------------------|
| <b>Overall</b>                            |                          |                          |                          |                          |                          |                          |                          |                          |                          |                          |
| # of hospitalized CDI cases               | 3030                     | 3068                     | 3354                     | 3481                     | 2816                     | 3161                     | 3836                     | 3919                     | 3687                     | 3557                     |
| CDI cases/100,000 PYs (CI)                | 31.41<br>(30.29 - 32.53) | 31.36<br>(30.25 - 32.47) | 33.89<br>(32.74 - 35.04) | 34.70<br>(33.55 - 35.86) | 27.67<br>(26.64 - 28.69) | 30.62<br>(29.55 - 31.68) | 36.67<br>(35.51 - 37.83) | 36.97<br>(35.81 - 38.13) | 34.34<br>(33.23 - 35.45) | 32.80<br>(31.73 - 33.88) |
| CDI cases/1000 hospital-days (CI)         | 0.52<br>(0.50 - 0.54)    | 0.55<br>(0.53 - 0.57)    | 0.58<br>(0.56 - 0.60)    | 0.59<br>(0.57 - 0.61)    | 0.49<br>(0.47 - 0.50)    | 0.55<br>(0.53 - 0.57)    | 0.66<br>(0.64 - 0.68)    | 0.68<br>(0.65 - 0.70)    | 0.63<br>(0.61 - 0.66)    | 0.61<br>(0.59 - 0.63)    |
| <b>ACH-acquired/ACH-onset</b>             |                          |                          |                          |                          |                          |                          |                          |                          |                          |                          |
| # of hospitalized CDI cases               | 1522                     | 1591                     | 1768                     | 1868                     | 1473                     | 1680                     | 1966                     | 1902                     | 1865                     | 1637                     |
| CDI cases/100,000 PYs (95% CI)            | 15.78<br>(14.99 - 16.57) | 16.26<br>(15.46 - 17.06) | 17.86<br>(17.03 - 18.70) | 18.62<br>(17.78 - 19.47) | 14.47<br>(13.73 - 15.21) | 16.27<br>(15.49 - 17.05) | 18.79<br>(17.96 - 19.62) | 17.94<br>(17.14 - 18.75) | 17.37<br>(16.58 - 18.16) | 15.10<br>(14.37 - 15.83) |
| CDI cases/1000 hospital-days (95% CI)     | 0.26<br>(0.25 - 0.27)    | 0.28<br>(0.27 - 0.30)    | 0.31<br>(0.29 - 0.32)    | 0.32<br>(0.30 - 0.33)    | 0.25<br>(0.24 - 0.27)    | 0.29<br>(0.28 - 0.31)    | 0.34<br>(0.32 - 0.35)    | 0.33<br>(0.31 - 0.34)    | 0.32<br>(0.31 - 0.34)    | 0.28<br>(0.27 - 0.29)    |
| <b>ACH- or LTCF-acquired/ACH-onset</b>    |                          |                          |                          |                          |                          |                          |                          |                          |                          |                          |
| # of hospitalized CDI cases               | 125                      | 125                      | 128                      | 128                      | 82                       | 50                       | 54                       | 60                       | 47                       | 43                       |
| CDI cases/100,000 PYs (95% CI)            | 1.30<br>(1.07 - 1.52)    | 1.28<br>(1.05 - 1.50)    | 1.29<br>(1.07 - 1.52)    | 1.28<br>(1.06 - 1.50)    | 0.81<br>(0.63 - 0.98)    | 0.48<br>(0.35 - 0.62)    | 0.52<br>(0.38 - 0.65)    | 0.57<br>(0.42 - 0.71)    | 0.44<br>(0.31 - 0.56)    | 0.40<br>(0.28 - 0.52)    |
| <b>LTCF-acquired/LTCF-onset</b>           |                          |                          |                          |                          |                          |                          |                          |                          |                          |                          |
| # of hospitalized CDI cases               | 66                       | 96                       | 119                      | 115                      | 67                       | 14                       | 27                       | 15                       | 11                       | 14                       |
| CDI cases/100,000 PYs (95% CI)            | 0.68<br>(0.52 - 0.85)    | 0.98<br>(0.79 - 1.18)    | 1.20<br>(0.99 - 1.42)    | 1.15<br>(0.94 - 1.36)    | 0.66<br>(0.50 - 0.82)    | 0.14<br>(0.06 - 0.21)    | 0.26<br>(0.16 - 0.36)    | 0.14<br>(0.07 - 0.21)    | 0.10<br>(0.04 - 0.16)    | 0.13<br>(0.06 - 0.20)    |
| <b>LTCF- or ACH-acquired/LTCF-onset</b>   |                          |                          |                          |                          |                          |                          |                          |                          |                          |                          |
| # of hospitalized CDI cases               | 75                       | 108                      | 106                      | 107                      | 83                       | 86                       | 106                      | 105                      | 72                       | 89                       |
| CDI cases/100,000 PYs (95% CI)            | 0.78<br>(0.60 - 0.95)    | 1.10<br>(0.90 - 1.31)    | 1.07<br>(0.87 - 1.27)    | 1.07<br>(0.86 - 1.27)    | 0.82<br>(0.64 - 0.99)    | 0.83<br>(0.66 - 1.01)    | 1.01<br>(0.82 - 1.21)    | 0.99<br>(0.80 - 1.18)    | 0.67<br>(0.52 - 0.83)    | 0.82<br>(0.65 - 0.99)    |
| CDI cases/1000 hospital-days (95% CI)     | 0.01<br>(0.01 - 0.02)    | 0.02<br>(0.02 - 0.02)    | 0.02<br>(0.01 - 0.02)    | 0.02<br>(0.01 - 0.02)    | 0.01<br>(0.01 - 0.02)    | 0.02<br>(0.01 - 0.02)    | 0.02<br>(0.01 - 0.02)    | 0.02<br>(0.01 - 0.02)    | 0.01<br>(0.01 - 0.02)    | 0.02<br>(0.01 - 0.02)    |
| <b>Community-acquired/community-onset</b> |                          |                          |                          |                          |                          |                          |                          |                          |                          |                          |
| # of hospitalized CDI cases               | 587                      | 514                      | 534                      | 573                      | 535                      | 669                      | 876                      | 990                      | 901                      | 1037                     |
| CDI cases/100,000 PYs (95% CI)            | 6.09<br>(5.59 - 6.58)    | 5.25<br>(4.80 - 5.71)    | 5.40<br>(4.94 - 5.85)    | 5.71<br>(5.24 - 6.18)    | 5.26<br>(4.81 - 5.70)    | 6.48<br>(5.99 - 6.97)    | 8.37<br>(7.82 - 8.93)    | 9.34<br>(8.76 - 9.92)    | 8.39<br>(7.84 - 8.94)    | 9.56<br>(8.98 - 10.15)   |
| <b>ACH-acquired/community-onset</b>       |                          |                          |                          |                          |                          |                          |                          |                          |                          |                          |
| # of hospitalized CDI cases               | 655                      | 634                      | 699                      | 690                      | 576                      | 662                      | 807                      | 847                      | 791                      | 737                      |
| CDI cases/100,000 PYs (95% CI)            | 6.79<br>(6.27 - 7.31)    | 6.48<br>(5.98 - 6.99)    | 7.06<br>(6.54 - 7.59)    | 6.88<br>(6.37 - 7.39)    | 5.66<br>(5.20 - 6.12)    | 6.41<br>(5.92 - 6.90)    | 7.71<br>(7.18 - 8.25)    | 7.99<br>(7.45 - 8.53)    | 7.37<br>(6.85 - 7.88)    | 6.80<br>(6.31 - 7.29)    |
| CDI cases/1000 hospital-days (95% CI)     | 0.11<br>(0.10 - 0.12)    | 0.11<br>(0.10 - 0.12)    | 0.12<br>(0.11 - 0.13)    | 0.12<br>(0.11 - 0.13)    | 0.10<br>(0.09 - 0.11)    | 0.12<br>(0.11 - 0.12)    | 0.14<br>(0.13 - 0.15)    | 0.15<br>(0.14 - 0.16)    | 0.14<br>(0.13 - 0.15)    | 0.13<br>(0.12 - 0.13)    |

ACH-onset CDI was calculated using patient-days at hospital as the denominator. The denominator of LTCF-onset CDI was the number of PYs living in LTCF for residents. The denominator for community-onset CDI was the number of PYs for individuals living in the community (not in LTCFs).
